# Supplementary material for: Toxicity and Anti-Proliferative Properties of Anisomeles indica Ethanol Extract on Cervical Cancer HeLa Cells and Zebrafish Embryos
Source: PubMed Central journal article supplement (PMC8003830; doi:10.3390/life11030257), 2021-03-20
Supplement: life-11-00257-s001.pdf [file life-11-00257-s001.pdf]

**Supplemental table 1: Primer sequences of genes used in the study**

| <b>Gene</b>                    | <b>Primer</b> | <b>Sequence</b>                    |
|--------------------------------|---------------|------------------------------------|
| P53                            | Forward       | <b>5-CCTCAGCATCTTATCCGAGTGG-3</b>  |
|                                | Reverse       | <b>5-TGGATGGTGGTACAGTCAGAGC-3</b>  |
| CASPASE-3                      | Forward       | <b>5-GGAAGCGAATCAATGGACTCTGG-3</b> |
|                                | Reverse       | <b>5-GCATCGACATCTGTACCAGACC-3</b>  |
| CASPASE-8                      | Forward       | <b>5-AGAAGAGGGTCATCCTGGGAGA-3</b>  |
|                                | Reverse       | <b>5-TCAGGACTTCCTTCAAGGCTGC-3</b>  |
| BAX                            | Forward       | <b>5-TGACGGCAACTTCAACTGGG-3</b>    |
|                                | Reverse       | <b>5-AGCACTCCCGCCACAAAGA-3</b>     |
| CDKN1A (p21 <sup>Cip1</sup> )  | Forward       | <b>5-AAGTCAGTTCCTTGTGGAGC-3</b>    |
|                                | Reverse       | <b>5-ATTAGCGCATCACAGTCGCG-3</b>    |
| CDKN2A (p16 <sup>INK4A</sup> ) | Forward       | <b>5- CAACGCACCGAATAGTTACG-3</b>   |
|                                | Reverse       | <b>5- TGCCCATCATCATGACCTGG-3</b>   |
| TBP                            | Forward       | <b>5-CACGAACCACGGCACTGATT-3</b>    |
|                                | Reverse       | <b>5-TTTTCTTGCTGCCAGTCTGGAC-3</b>  |
